# Supplementary material
Source: publisher figshare collection journal article supplement (https://frontiersin.figshare.com/ndownloader/files/13612178)

# **SUPPORTING INFORMATION**

## **Microwave-Assisted Knoevenagel-Doebner Reaction: An Efficient Method for Phenolic Acids Synthesis**

Louis M. M. Mouterde and Florent Allais\*

AgroParisTech, Chaire Agro-Biotechnologie Industrielles (ABI), CEBB, 3 rue des Rouges  
Terres, 51110 Pomacle, France.

Phone & Fax +33 3 52 62 04 62, E-mail [florent.allais@agroparistech.fr](mailto:florent.allais@agroparistech.fr)

\*Author to whom correspondence should be addressed

## Contents

|                                                                                                                                                                          |      |
|--------------------------------------------------------------------------------------------------------------------------------------------------------------------------|------|
| D-optimal design for optimization of the conversion rate (experimental values calculated accordingly the production of ferulic acid, analyzed by $^1\text{H}$ NMR) ..... | S-3  |
| $^1\text{H}$ NMR spectrum of the crude mixture of 4-Hydroxybenzaldehyde, Coumaric acid and 4-Vinylphenol .....                                                           | S-4  |
| $^1\text{H}$ spectrum of pure Coumaric acid .....                                                                                                                        | S-5  |
| $^{13}\text{C}$ NMR spectrum of pure Coumaric acid .....                                                                                                                 | S-6  |
| $^1\text{H}$ NMR spectrum of the crude mixture of 3,4-dihydroxybenzaldehyde, Caffeic acid and 4-Vinylbenzene-1,2-diol .....                                              | S-7  |
| $^1\text{H}$ NMR spectrum of Caffeic acid .....                                                                                                                          | S-8  |
| $^{13}\text{C}$ NMR spectrum of Caffeic acid .....                                                                                                                       | S-9  |
| $^1\text{H}$ NMR spectrum of the crude mixture of Vanillin, Ferulic acid and 2-Methoxy-4-vinylphenol .....                                                               | S-10 |
| $^1\text{H}$ NMR spectrum of Ferulic acid .....                                                                                                                          | S-11 |
| $^{13}\text{C}$ NMR spectrum of Ferulic acid .....                                                                                                                       | S-12 |
| $^1\text{H}$ NMR spectrum of the crude mixture of 5-hydroxyvanillin, 3,4-Dihydroxy-5-methoxycinnamic acid and 3-Methoxy-5-vinylbenzene-1,2-diol .....                    | S-13 |
| $^1\text{H}$ NMR spectrum of 3,4-Dihydroxy-5-methoxycinnamic acid .....                                                                                                  | S-14 |
| $^{13}\text{C}$ NMR spectrum of 3,4-Dihydroxy-5-methoxycinnamic acid .....                                                                                               | S-15 |
| $^1\text{H}$ NMR spectrum of the crude mixture of Syringaldehyde, Sinapic acid and 2,6-dimethoxy-4-vinylphenol .....                                                     | S-16 |
| $^1\text{H}$ NMR spectrum of Sinapic acid .....                                                                                                                          | S-17 |
| $^{13}\text{C}$ NMR spectrum of Sinapic acid .....                                                                                                                       | S-18 |

D-optimal design for optimization of the conversion rate (experimental values calculated accordingly the production of ferulic acid, analyzed by  $^1\text{H}$  NMR)

| Experimental number | Factor            |            |                |             | Conversion Acid (%) | Conversion Vinyl (%) |
|---------------------|-------------------|------------|----------------|-------------|---------------------|----------------------|
|                     | Temperature (° C) | Time (min) | Eq. piperidine | Eq. malonic |                     |                      |
| 1                   | 100               | 10         | 0.125          | 2           | 31                  | 0                    |
| 2                   | 140               | 10         | 0.125          | 2           | 33                  | 13                   |
| 3                   | 100               | 30         | 0.125          | 2           | 39                  | 1                    |
| 4                   | 140               | 10         | 0.25           | 2           | 25                  | 33                   |
| 5                   | 100               | 30         | 0.25           | 2           | 54                  | 5                    |
| 6                   | 140               | 30         | 0.25           | 2           | 0                   | 50                   |
| 7                   | 100               | 10         | 0.125          | 4           | 22                  | 0                    |
| 8                   | 100               | 30         | 0.125          | 4           | 50                  | 0                    |
| 9                   | 140               | 30         | 0.125          | 4           | 41                  | 19                   |
| 10                  | 100               | 10         | 0.25           | 4           | 33                  | 0                    |
| 11                  | 140               | 10         | 0.25           | 4           | 40                  | 21                   |
| 12                  | 140               | 30         | 0.25           | 4           | 26                  | 36                   |
| 13                  | 100               | 20         | 0.1875         | 3           | 40                  | 1                    |
| 14                  | 140               | 20         | 0.1875         | 3           | 27                  | 27                   |
| 15                  | 120               | 10         | 0.1875         | 3           | 45                  | 5                    |
| 16                  | 120               | 30         | 0.1875         | 3           | 62                  | 19                   |
| 17                  | 120               | 20         | 0.125          | 3           | 54                  | 5                    |
| 18                  | 120               | 20         | 0.25           | 3           | 60                  | 19                   |
| 19                  | 120               | 20         | 0.1875         | 2           | 56                  | 20                   |
| 20                  | 120               | 20         | 0.1875         | 4           | 62                  | 9                    |
| 21                  | 120               | 20         | 0.1875         | 3           | 62                  | 12                   |
| 22                  | 120               | 20         | 0.1875         | 3           | 63                  | 13                   |
| 23                  | 120               | 20         | 0.1875         | 3           | 60                  | 14                   |
| 24                  | 110               | 10         | 0.125          | 2           | 53                  | 6                    |
| 25                  | 110               | 15         | 0.125          | 3           | 68                  | 18                   |
| 26                  | 100               | 20         | 0.125          | 3           | 61                  | 5                    |
| 27                  | 100               | 60         | 0.125          | 3           | 74                  | 17                   |
| 28                  | 110               | 10         | 0.25           | 3           | 54                  | 6                    |

$^1\text{H}$  NMR spectrum of the crude mixture of 4-Hydroxybenzaldehyde, Coumaric acid and 4-Vinylphenol

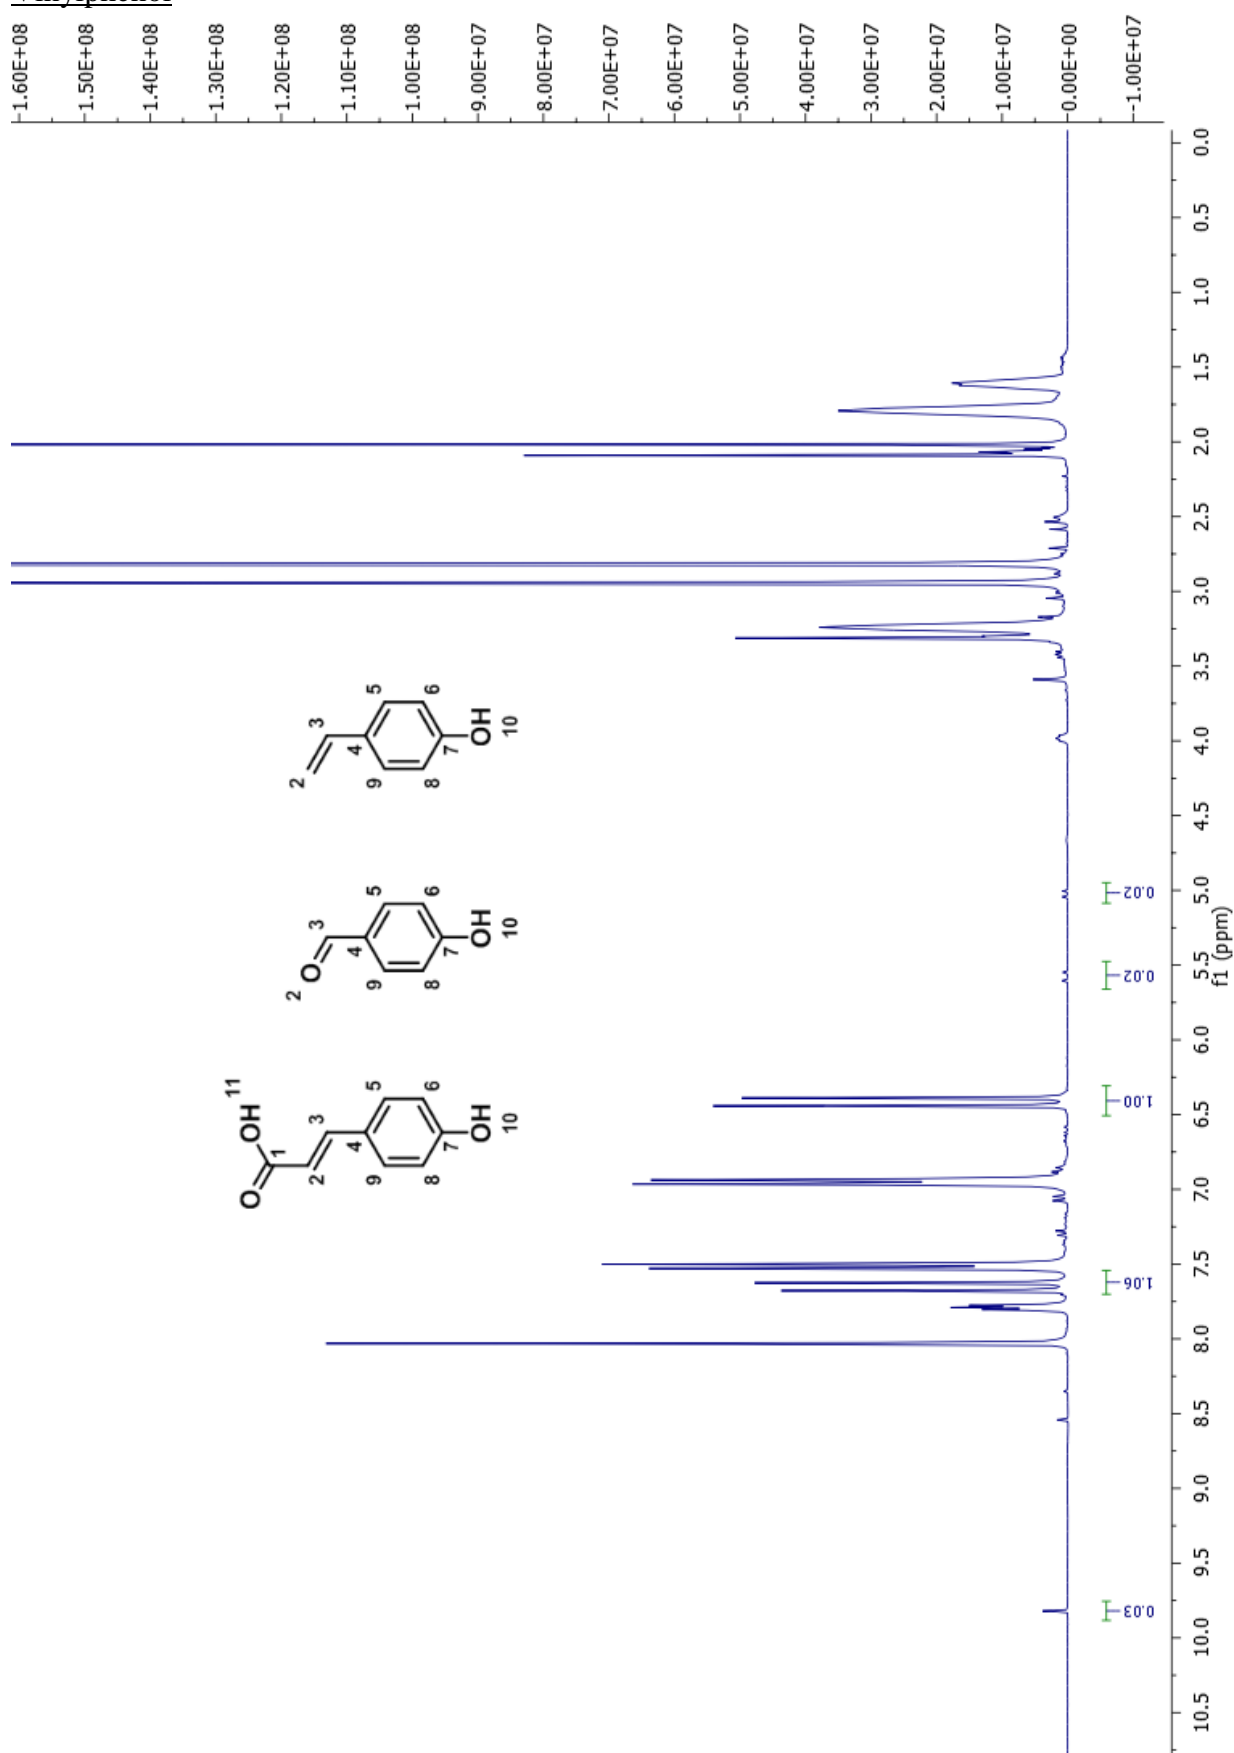

# <sup>1</sup>H spectrum of pure Coumaric acid

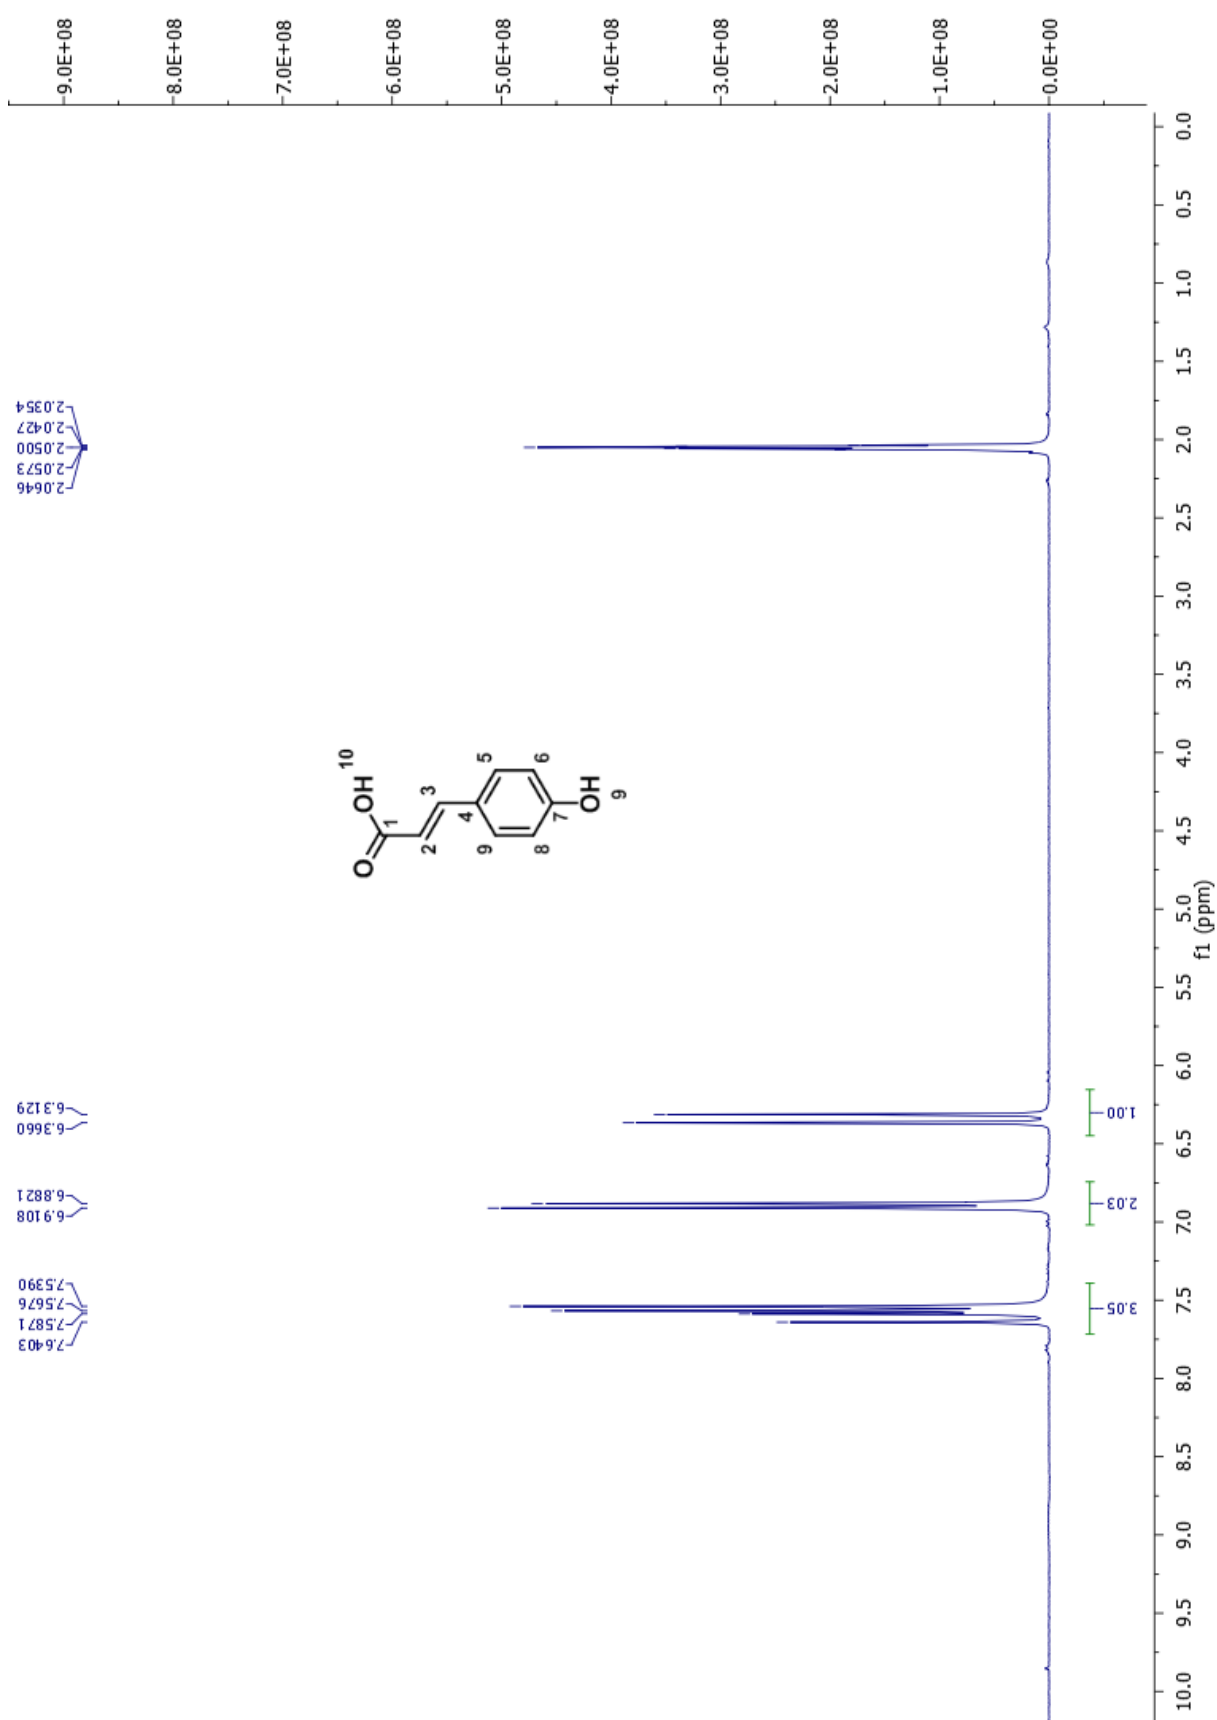

<sup>13</sup>C NMR spectrum of pure Coumaric acid

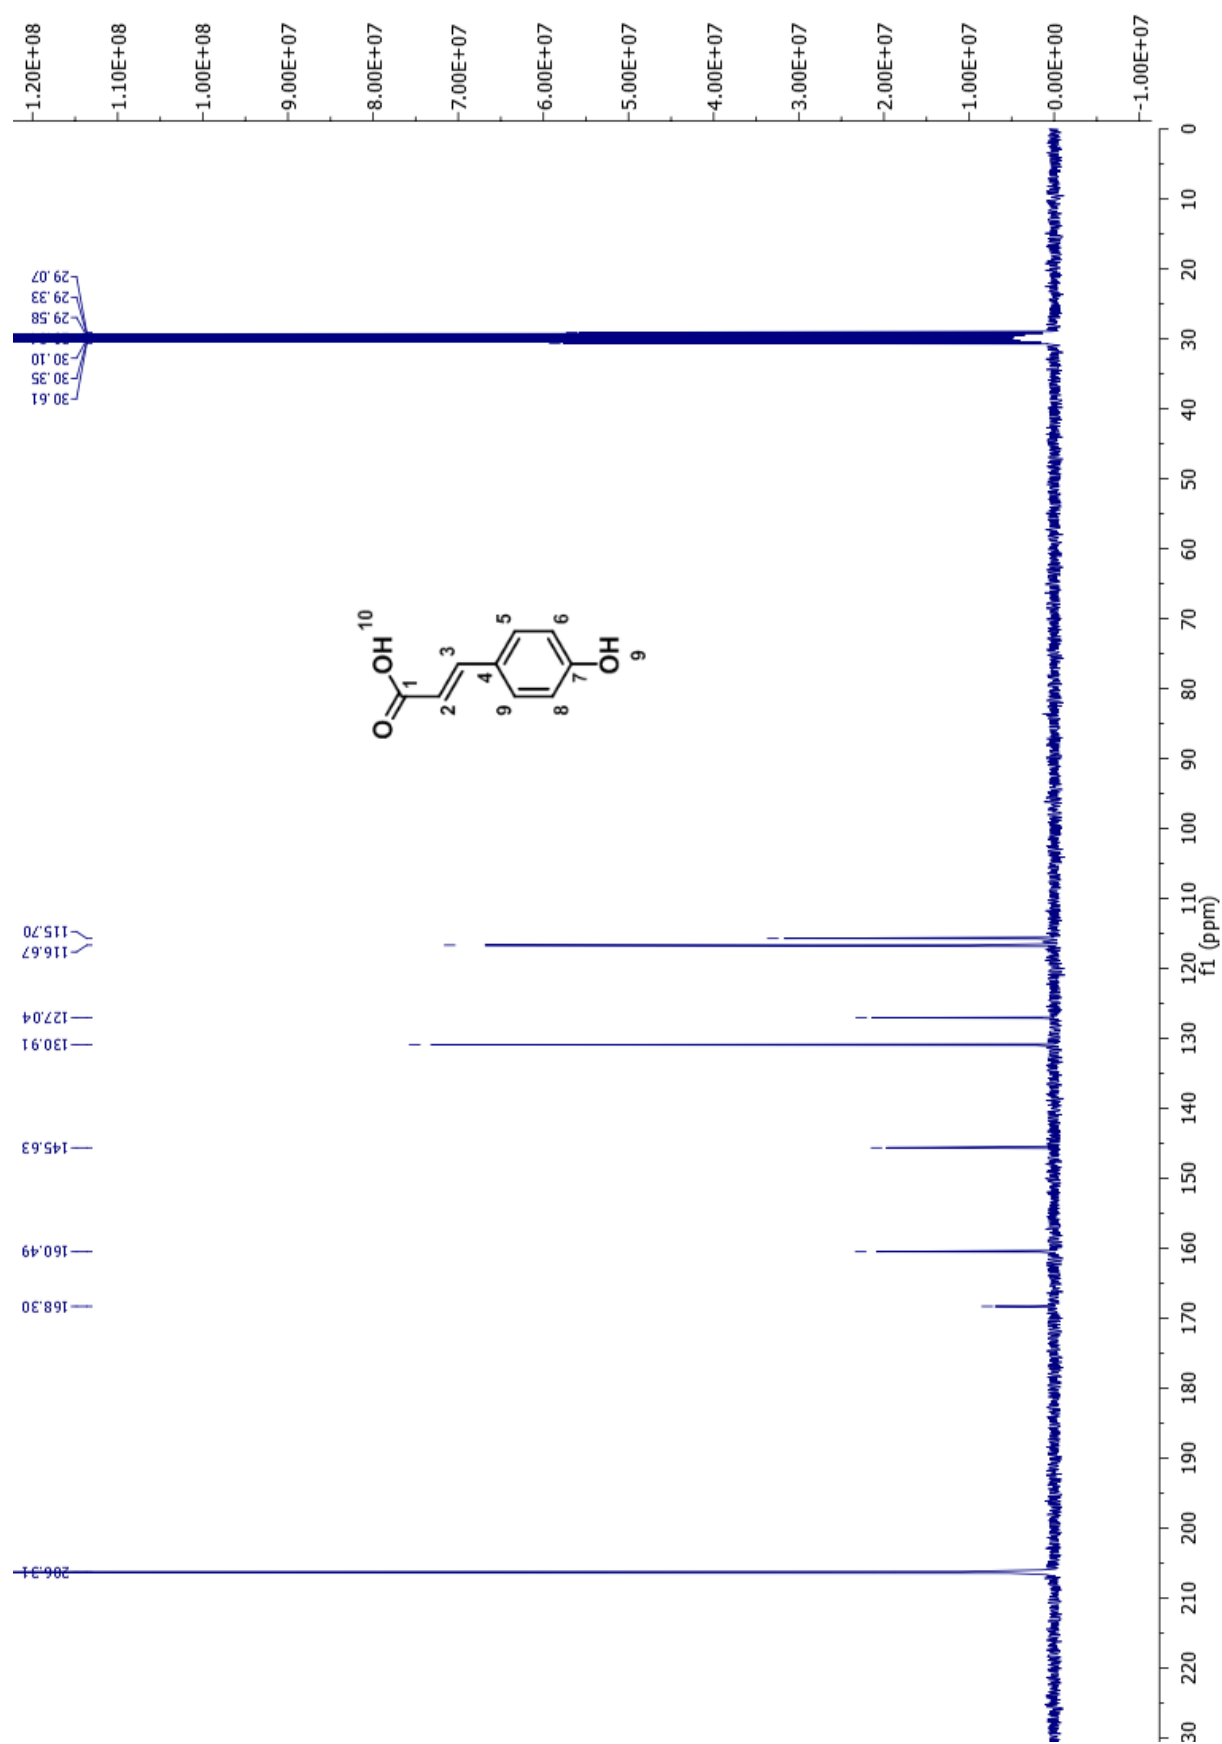

$^1\text{H}$  NMR spectrum of the crude mixture of 3,4-dihydroxybenzaldehyde, Caffeic acid and 4-Vinylbenzene-1,2-diol

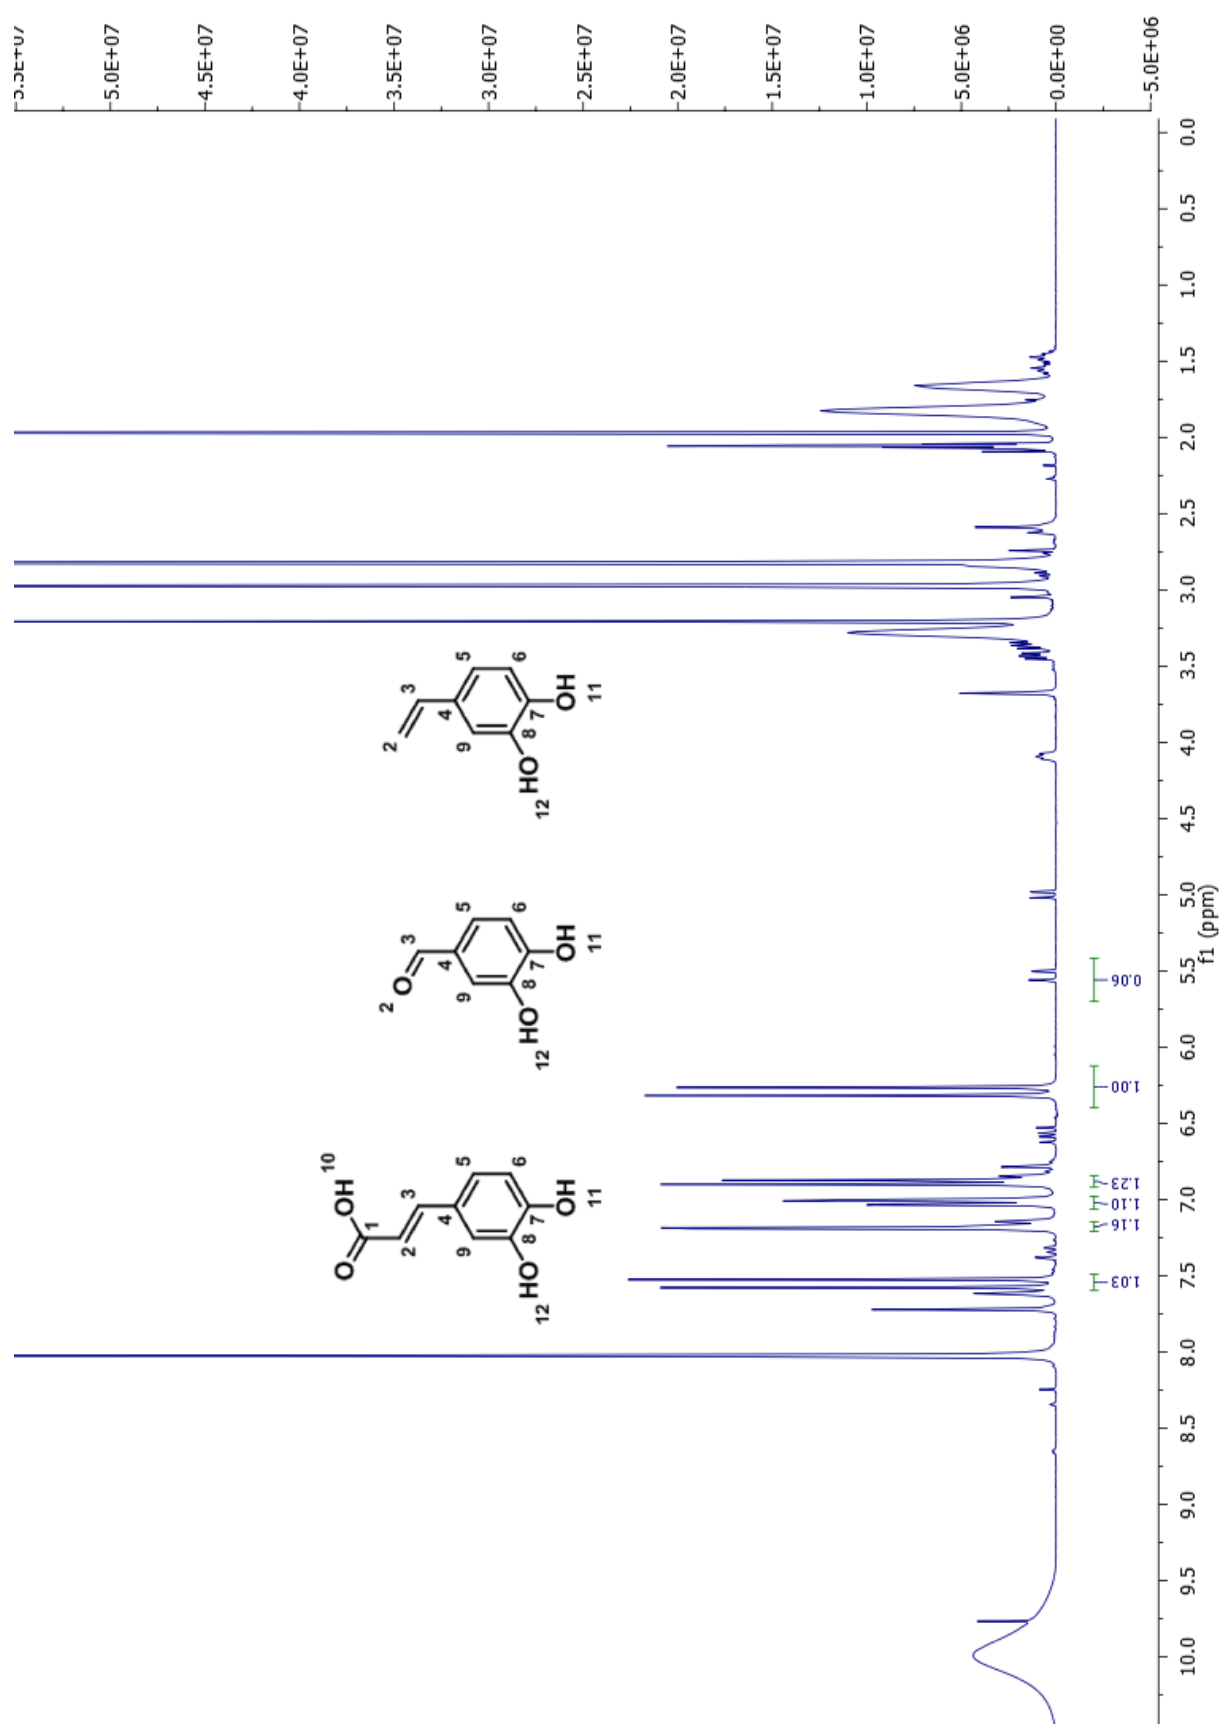

# <sup>1</sup>H NMR spectrum of Caffeic acid

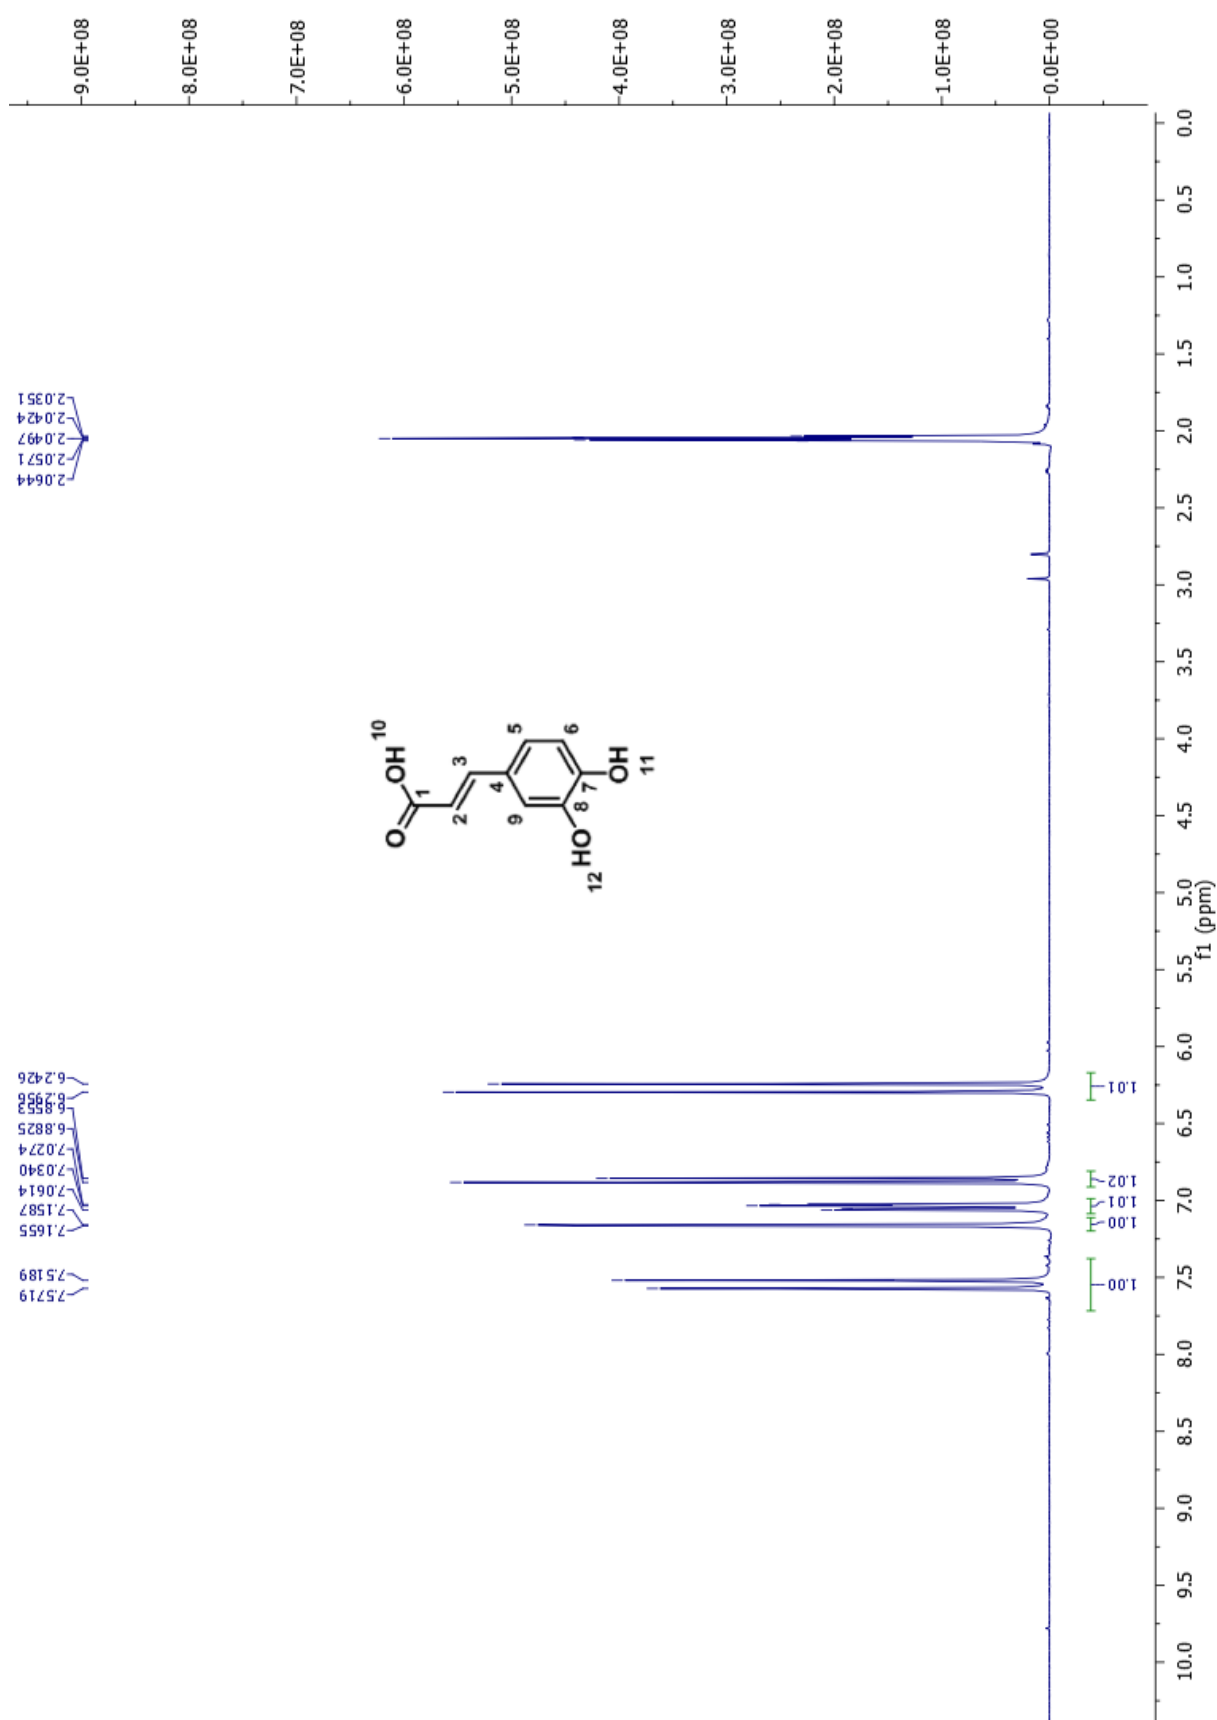

# <sup>13</sup>C NMR spectrum of Caffeic acid

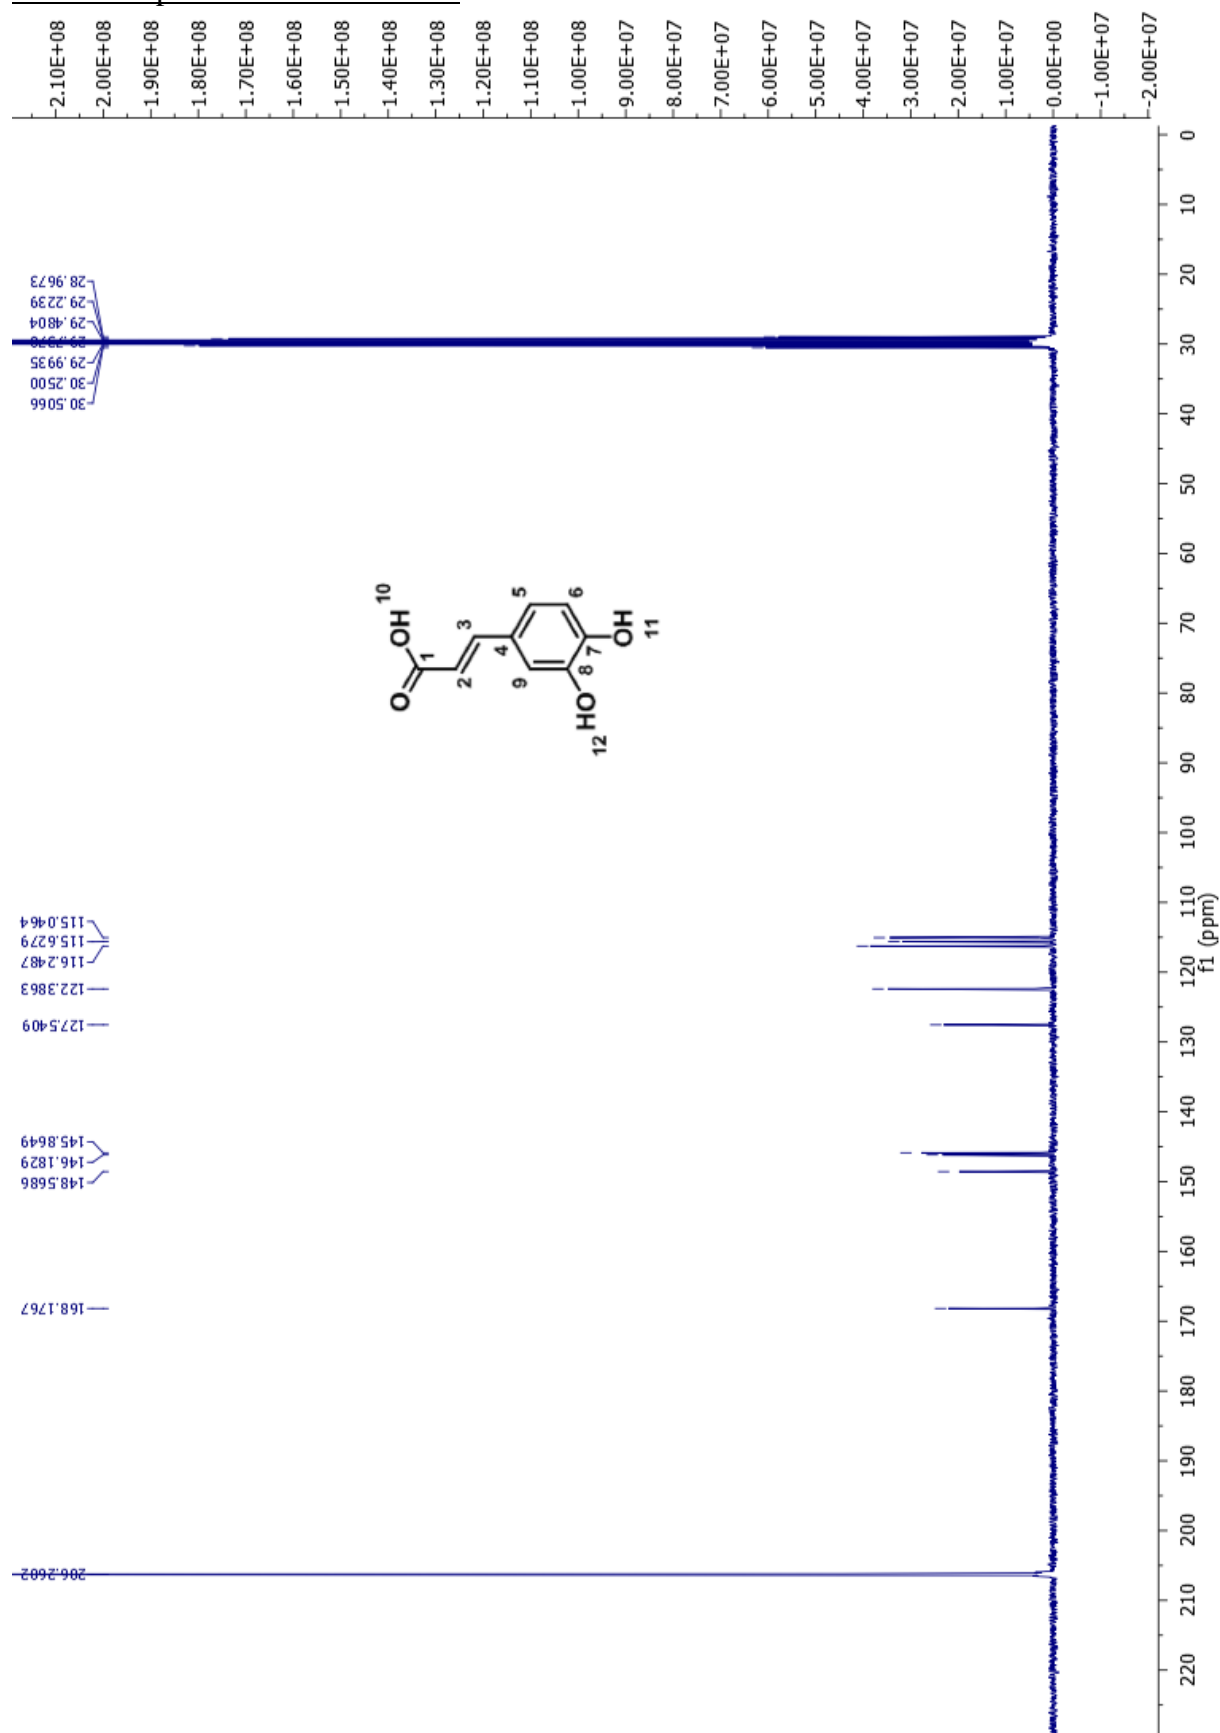

<sup>1</sup>H NMR spectrum of the crude mixture of Vanillin, Ferulic acid and 2-Methoxy-4-vinylphenol

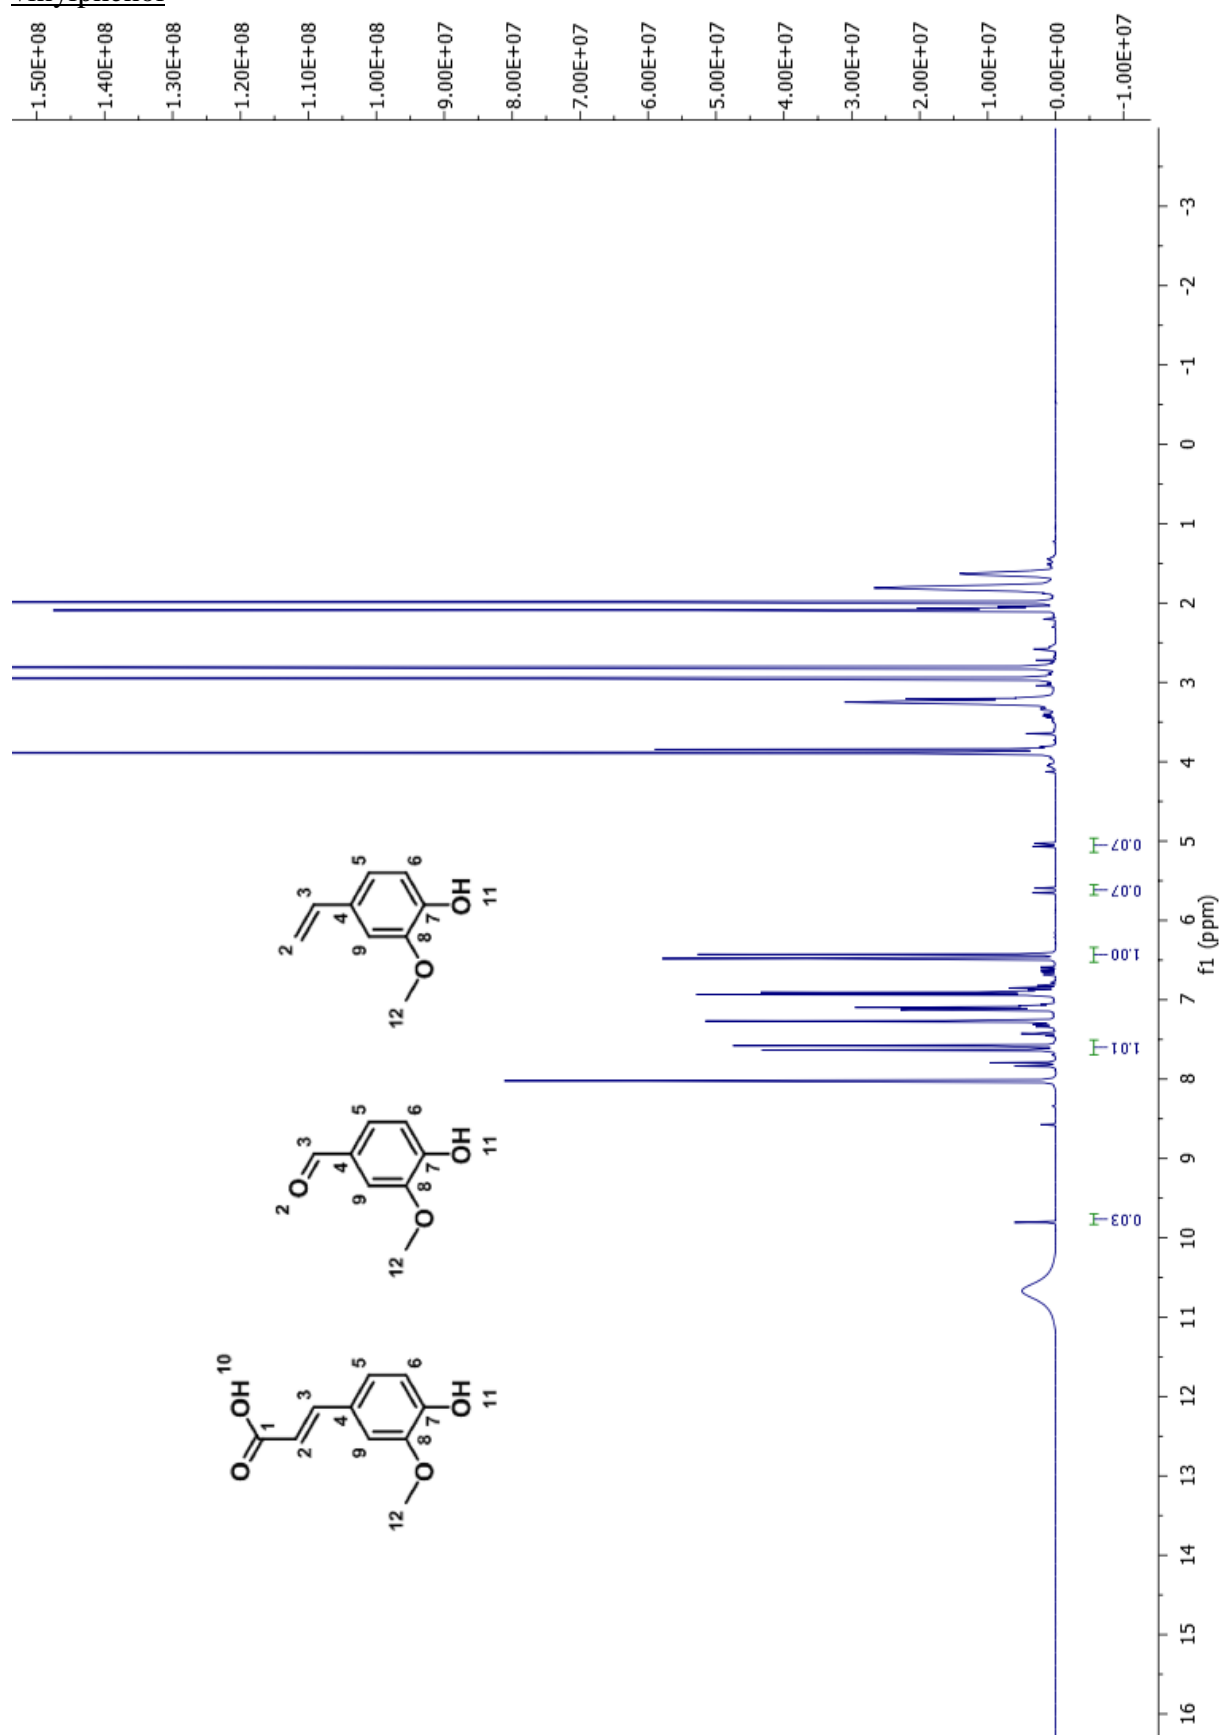

# <sup>1</sup>H NMR spectrum of Ferulic acid

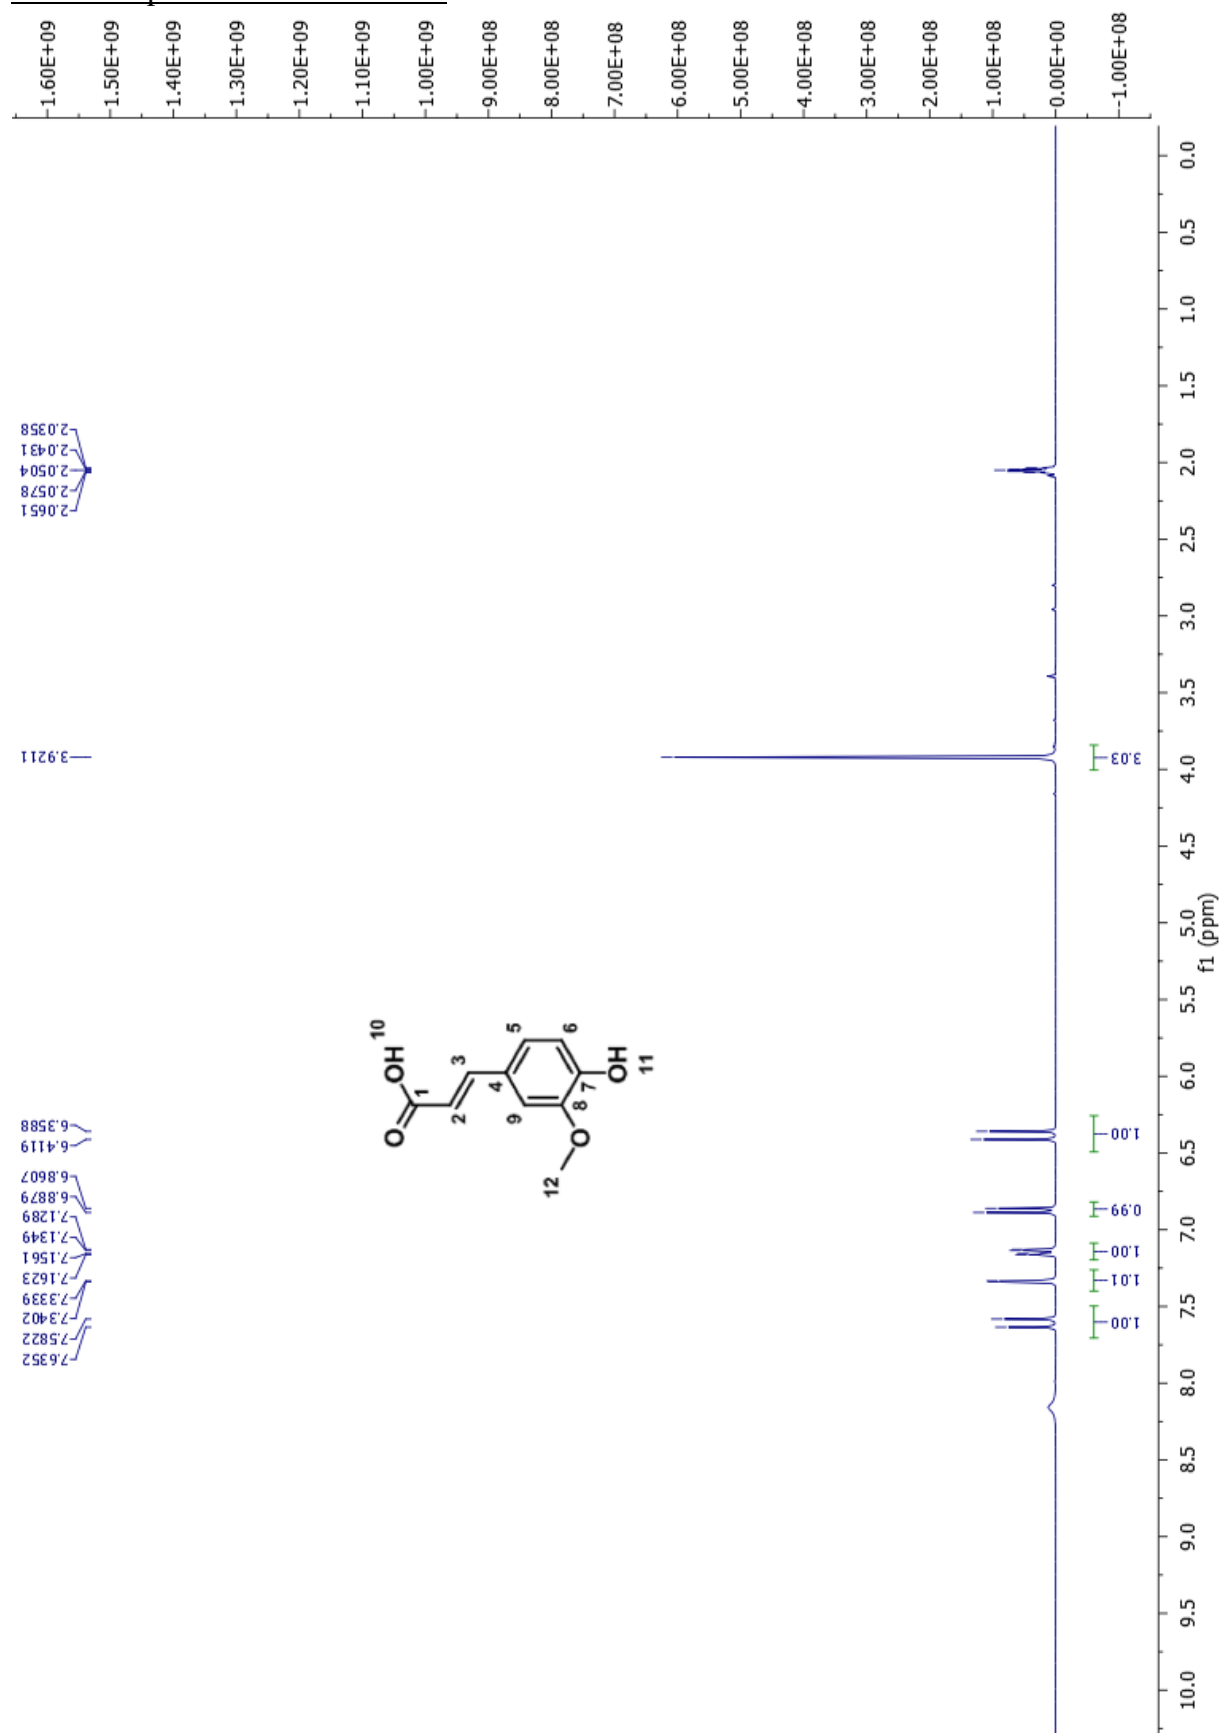

<sup>13</sup>C NMR spectrum of Ferulic acid

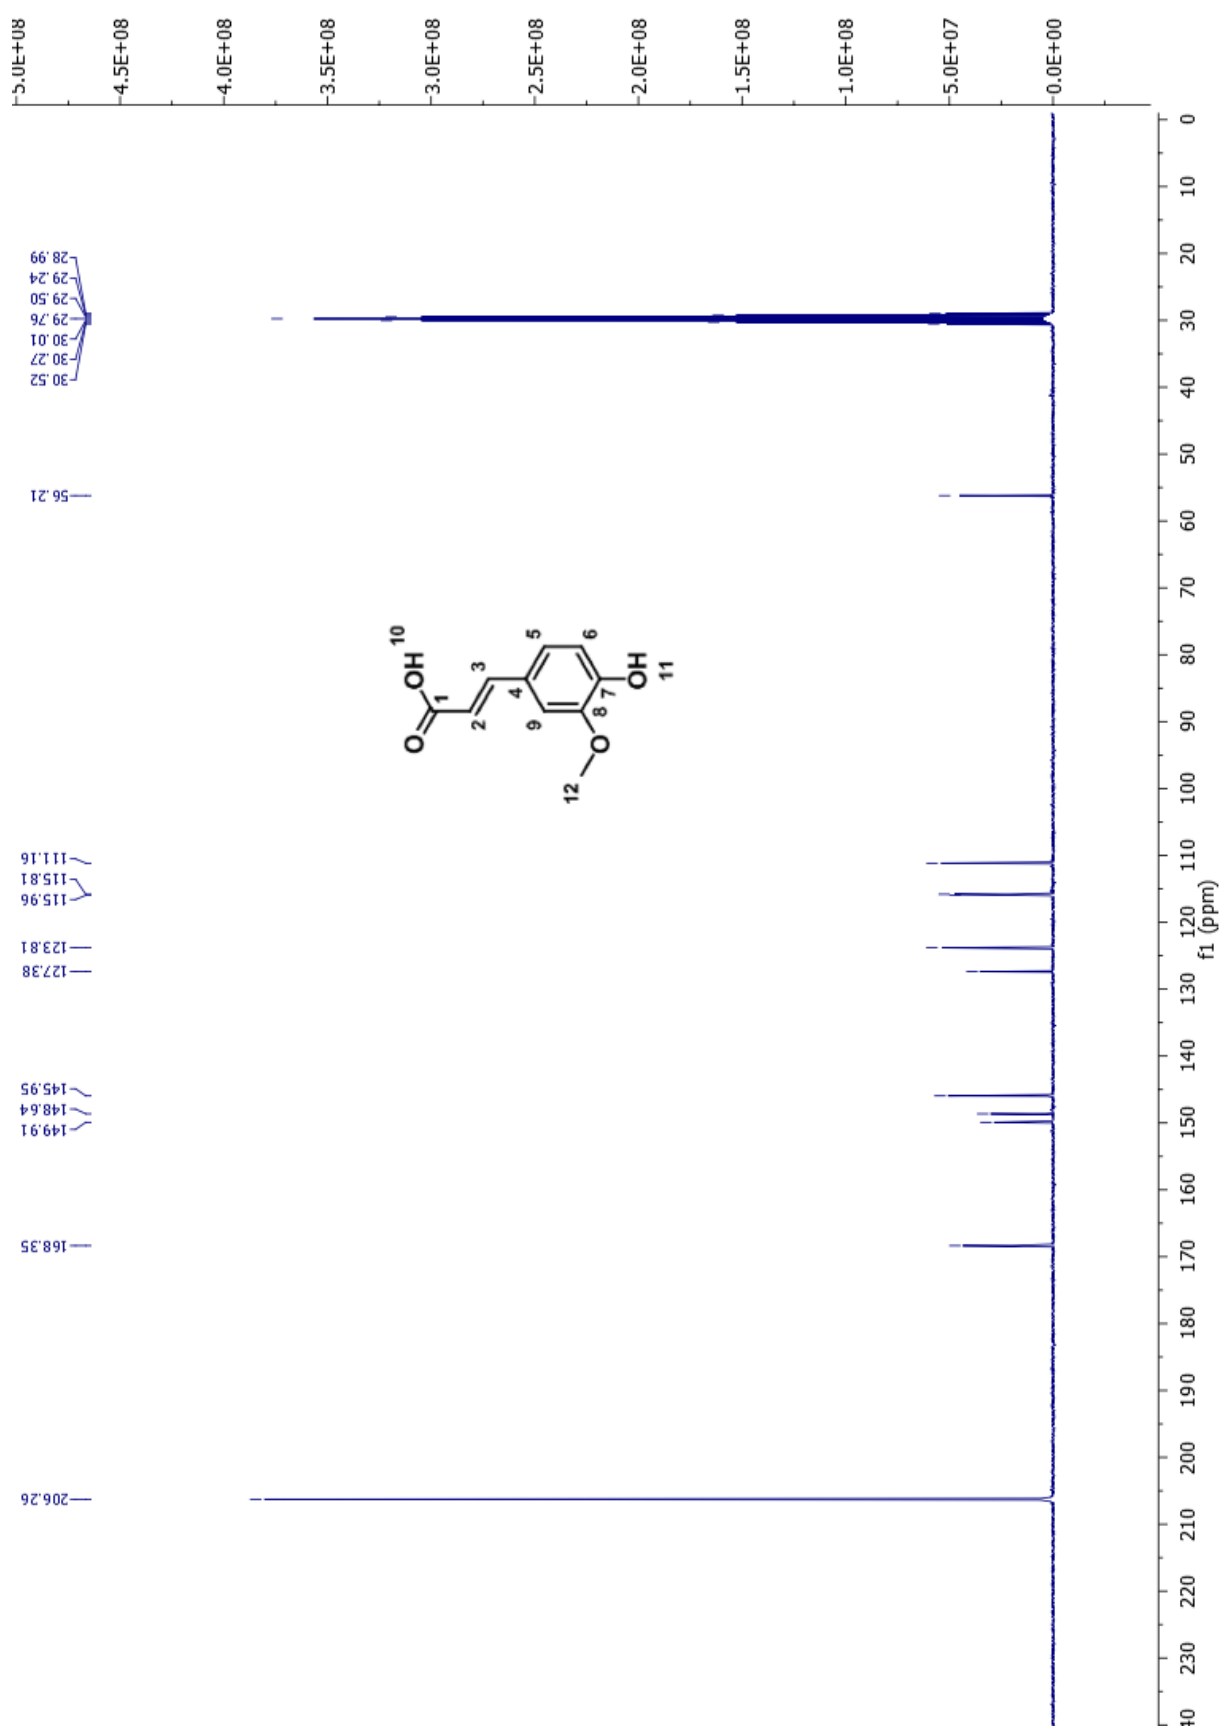

$^1\text{H}$  NMR spectrum of the crude mixture of 5-hydroxyvanillin, 3,4-Dihydroxy-5-methoxycinnamic acid and 3-Methoxy-5-vinylbenzene-1,2-diol

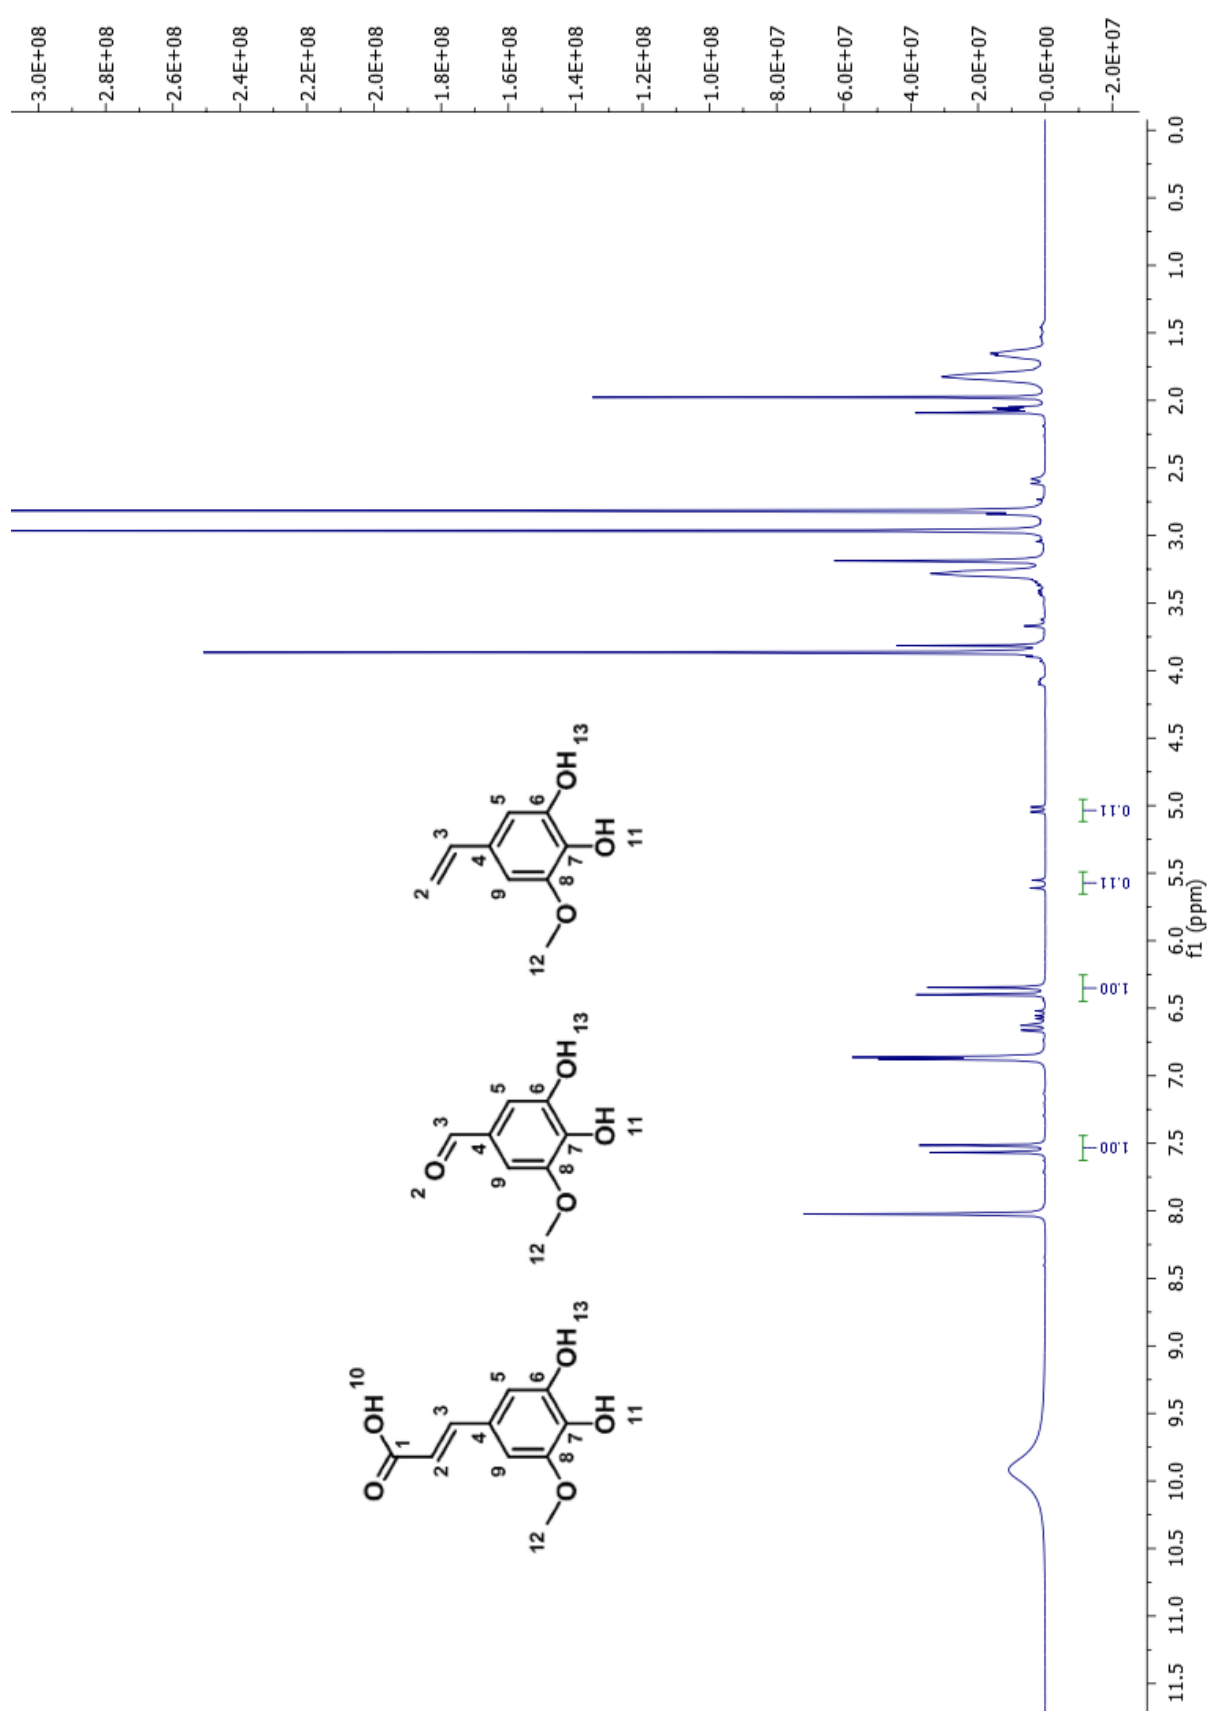

# <sup>1</sup>H NMR spectrum of 3,4-Dihydroxy-5-methoxycinnamic acid

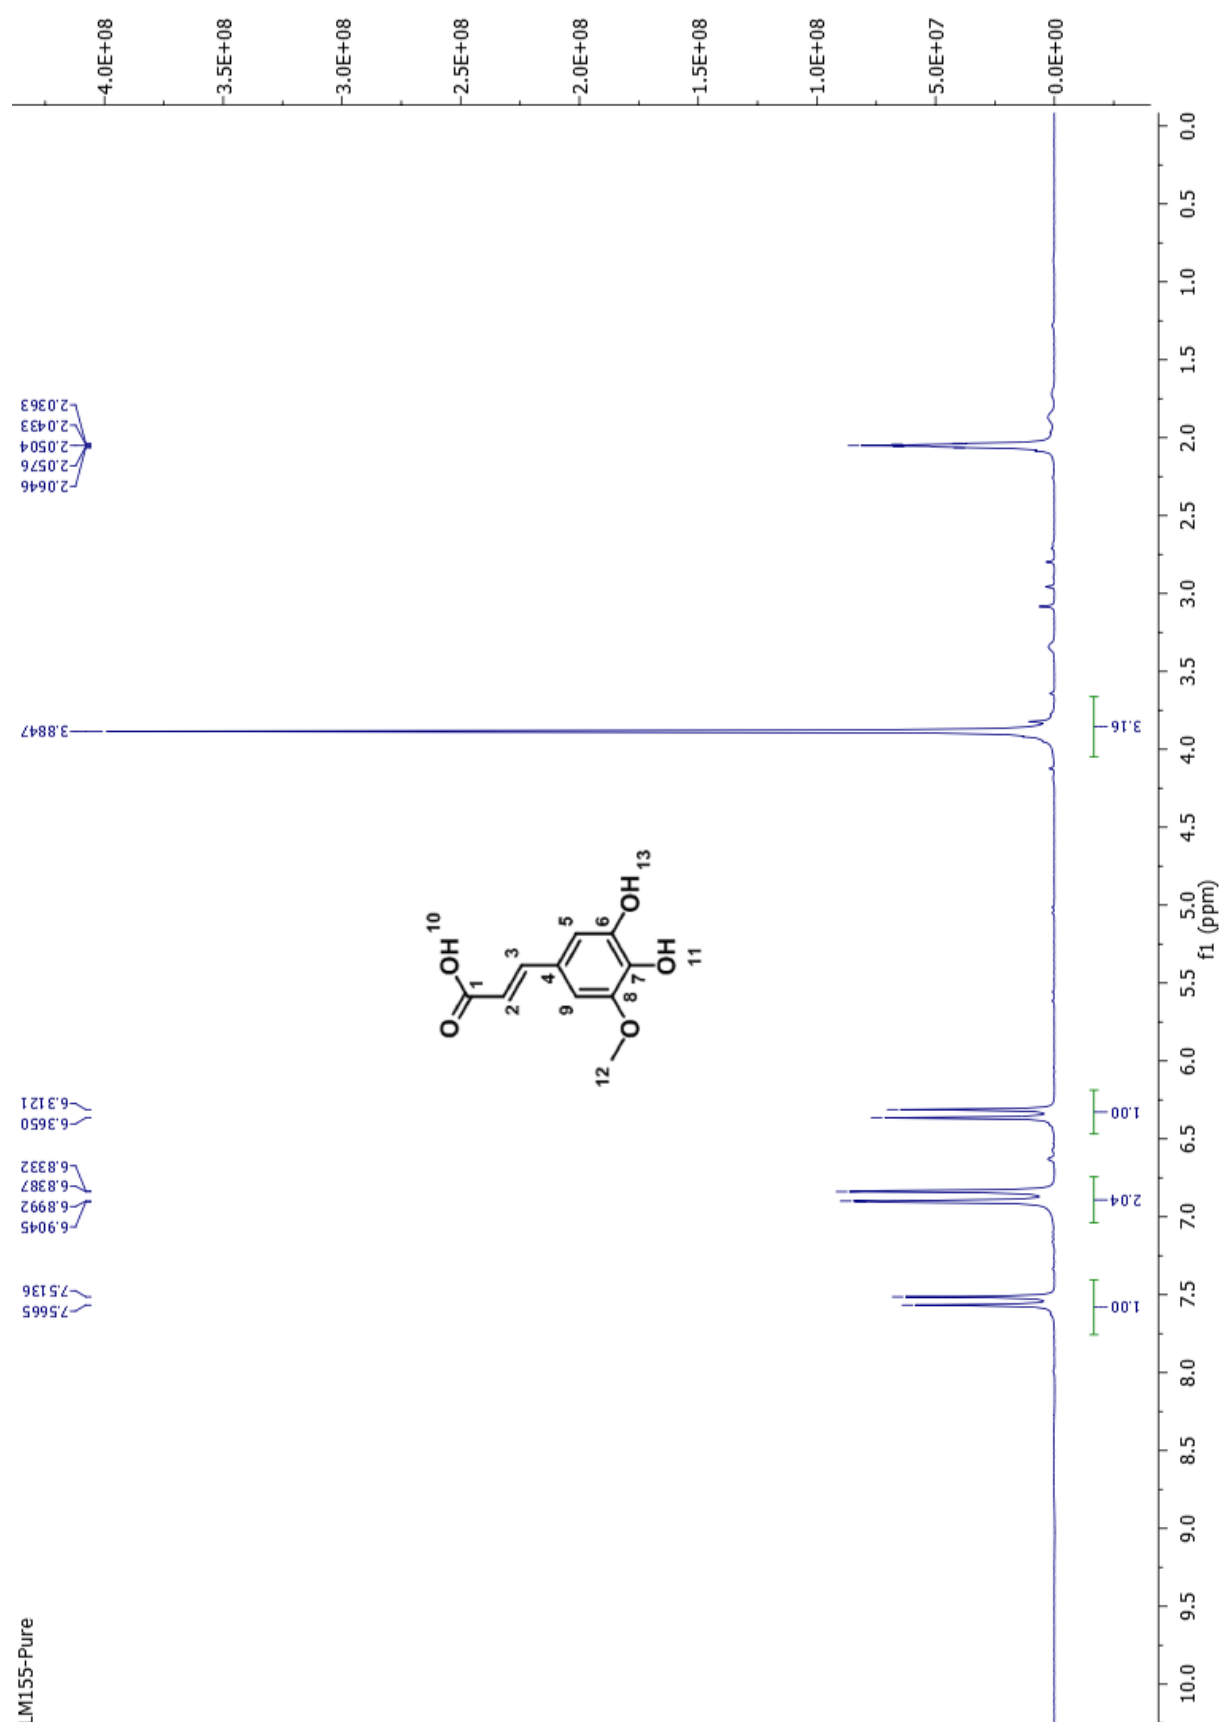

<sup>13</sup>C NMR spectrum of 3,4-Dihydroxy-5-methoxycinnamic acid

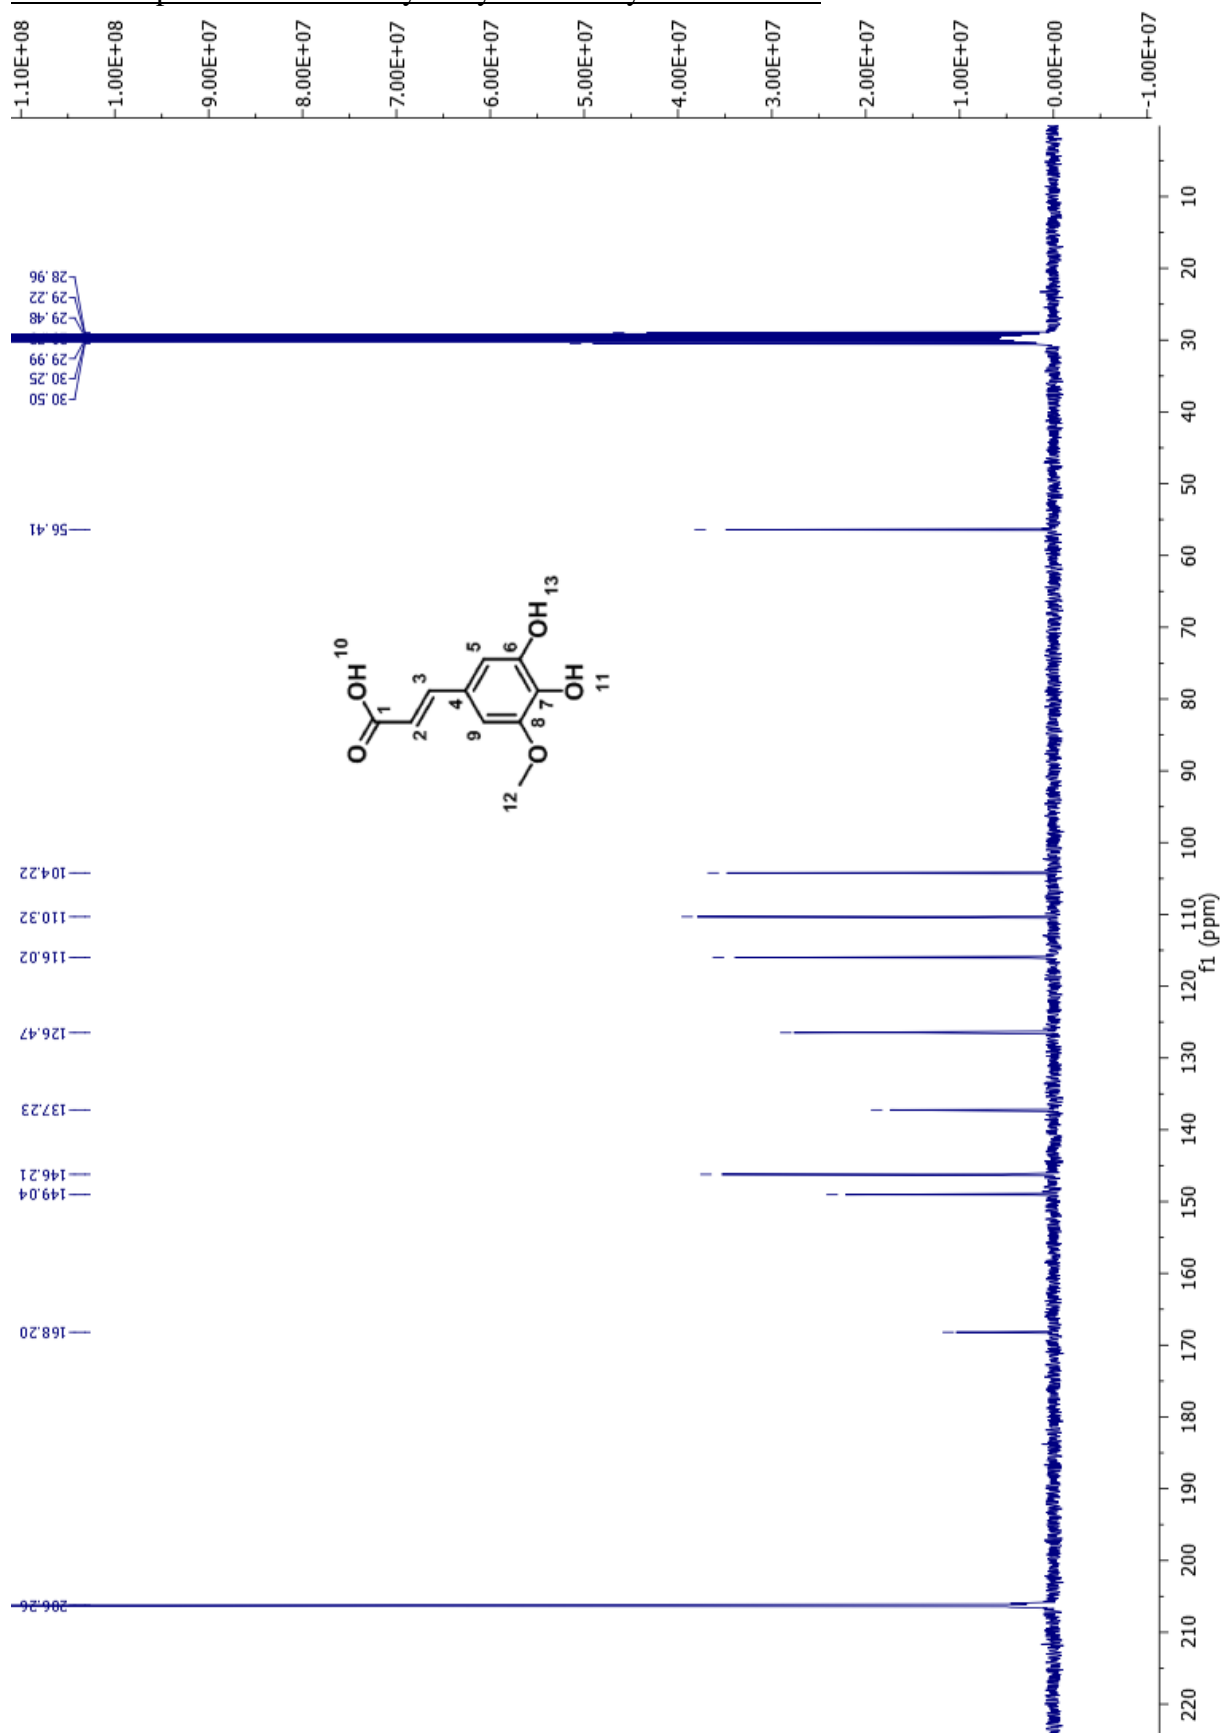

$^1\text{H}$  NMR spectrum of the crude mixture of Syringaldehyde. Sinapic acid and 2,6-dimethoxy-4-vinylphenol

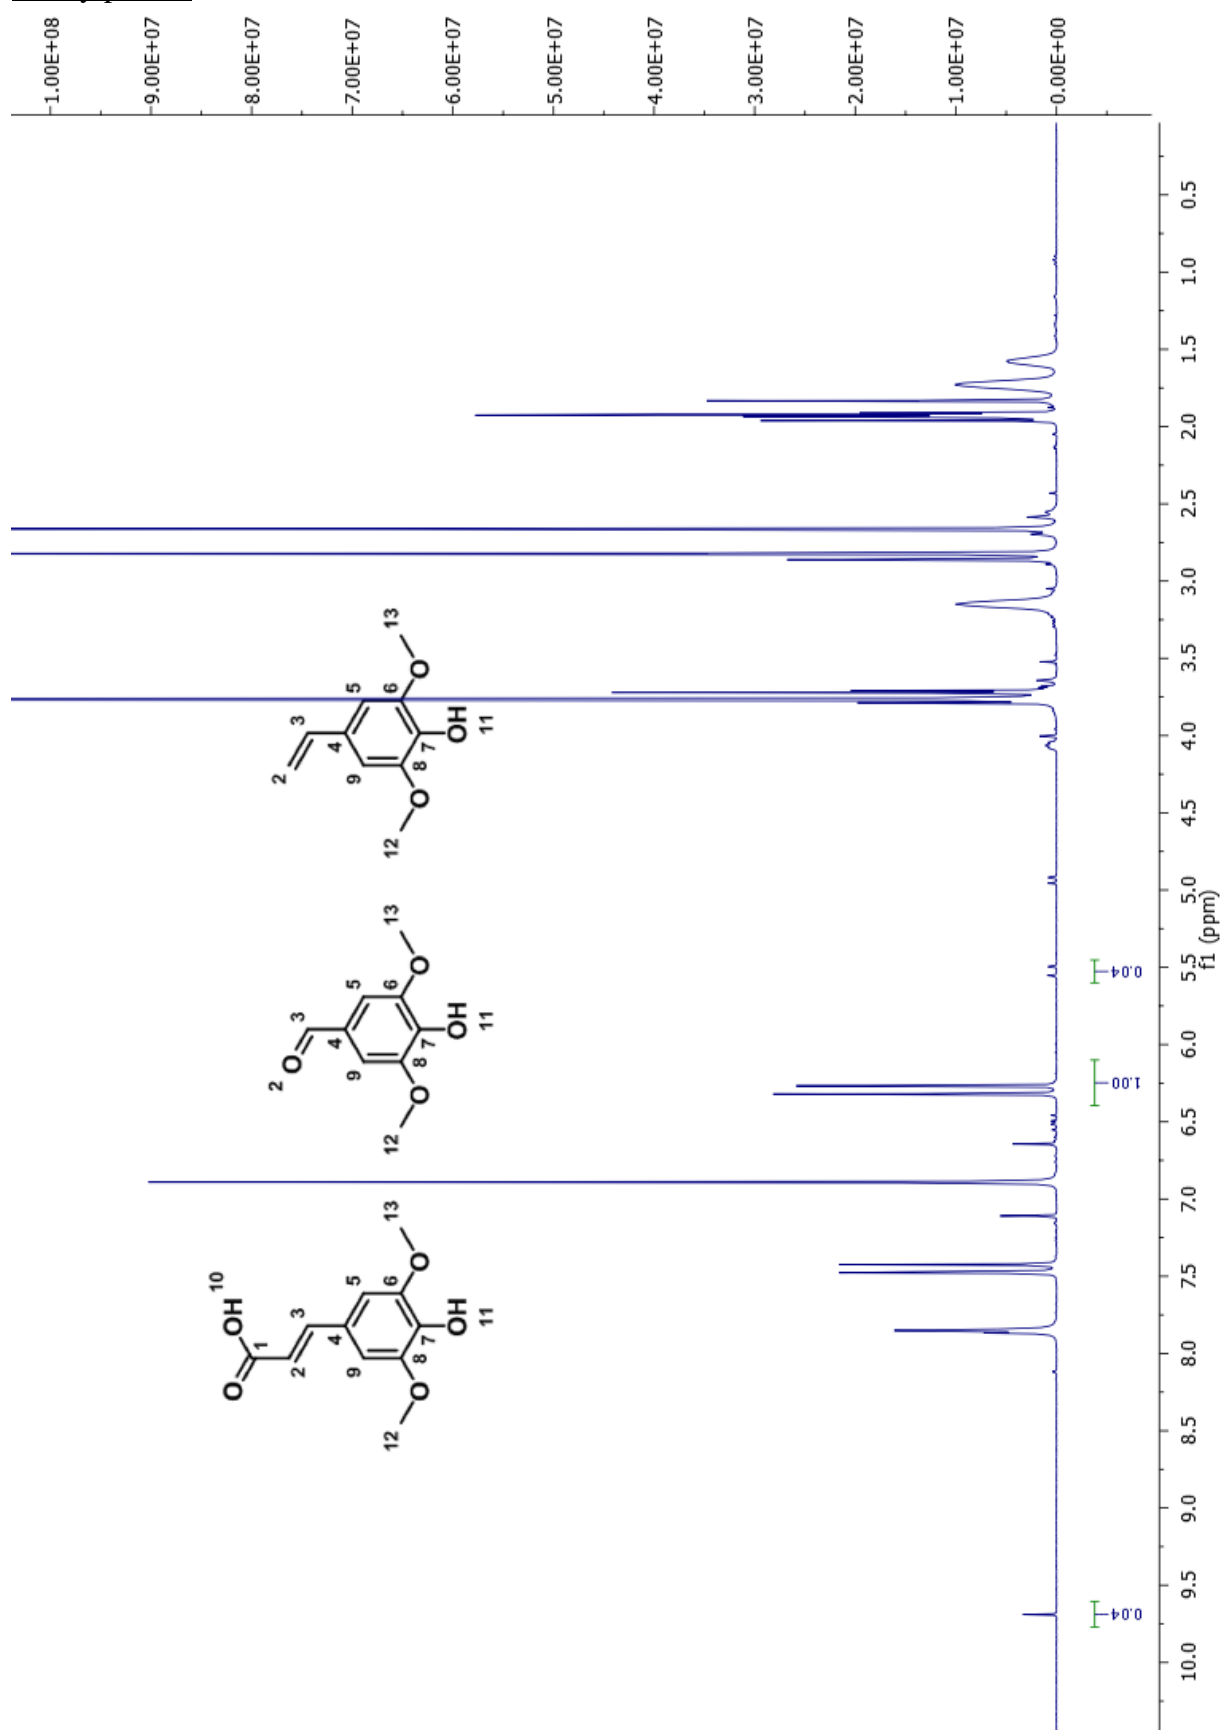

# <sup>1</sup>H NMR spectrum of Sinapic acid

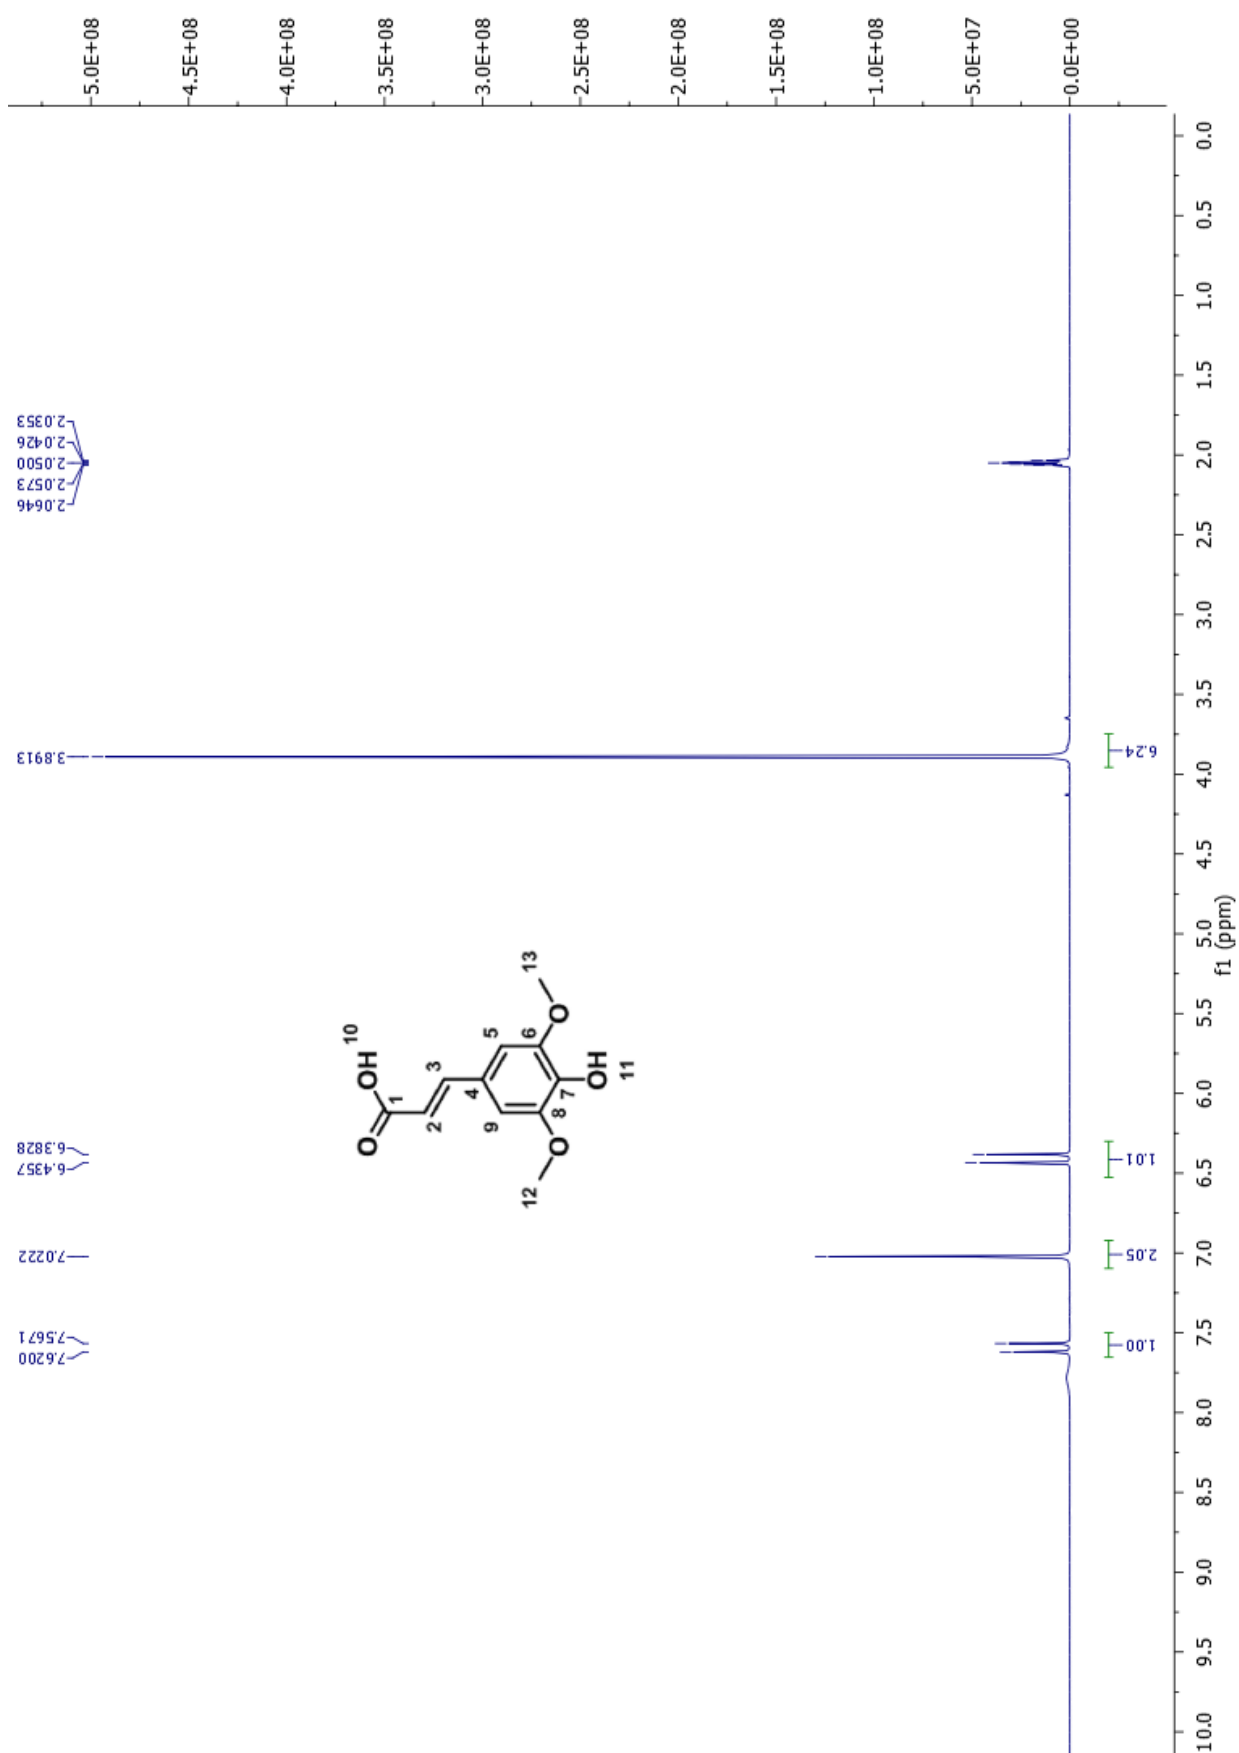

# <sup>13</sup>C NMR spectrum of Sinapic acid

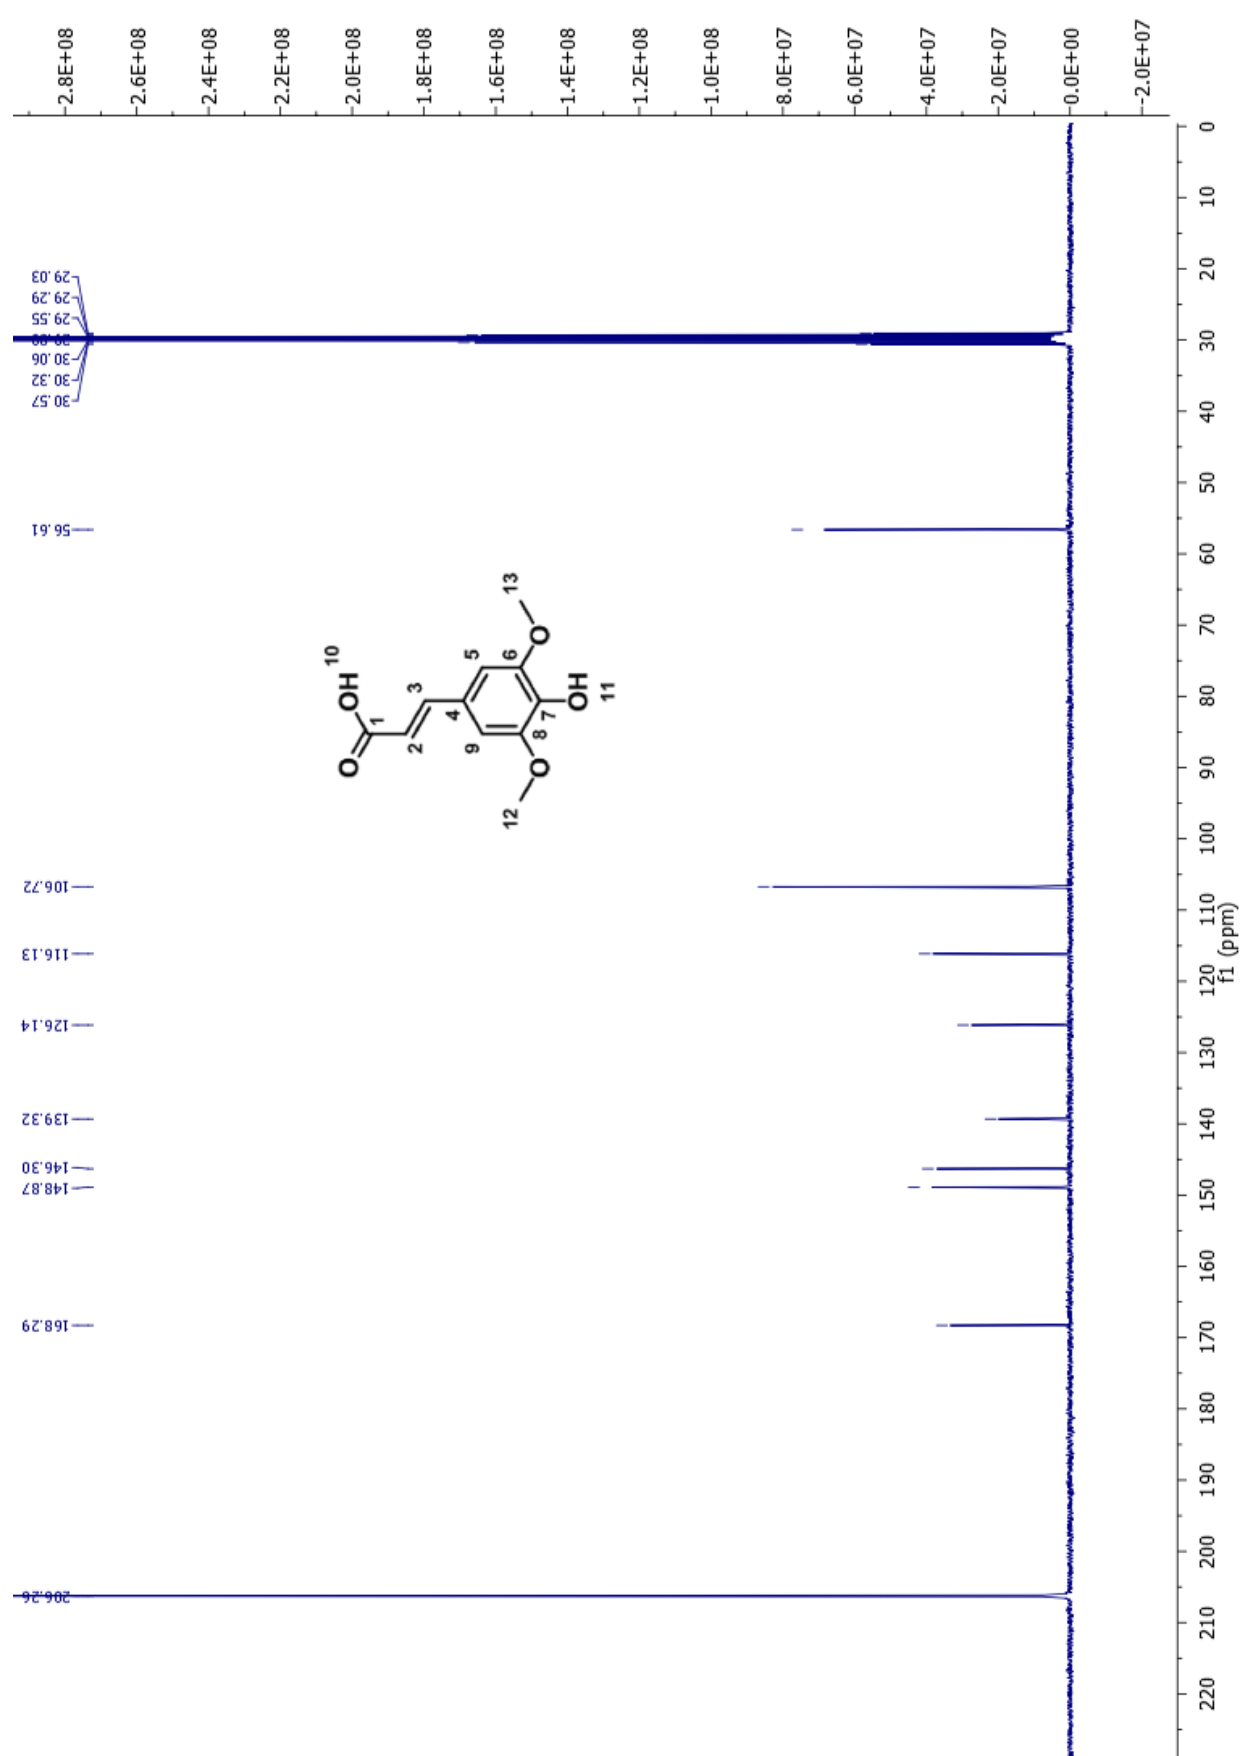

Supplement: Supplementary file [file 13612178]
